# Supplementary material
Source: PubMed Central journal article supplement (PMC8518186)
Supplement: 12873_2021_509_MOESM1_ESM.pdf [file 12873_2021_509_MOESM1_ESM.pdf]

## Additional file 1 Participant characteristics

|                                                           |           |          |              |                         |            |
|-----------------------------------------------------------|-----------|----------|--------------|-------------------------|------------|
| <b>ID</b>                                                 |           |          |              |                         |            |
| <b>Date</b>                                               |           |          |              |                         |            |
| <b>Scenario (clinical problem)</b>                        |           |          |              |                         |            |
| <b>Scenario number</b>                                    | 1         | 2        | 3            | 4                       | 5          |
| <b>Function</b>                                           | Nurse     | Resident |              | Fellow/neonatologist    | NP/PA      |
| <b>Age</b>                                                |           |          |              |                         |            |
| <b>Sex</b>                                                | Female    |          |              | Male                    |            |
|                                                           |           |          |              |                         |            |
| <b>Previous participation in NALS training</b>            | 1x        | 2x       |              | 3x                      | ≥ 4x       |
| <b>Previous participation in relevant courses</b>         | NLS/ NALS |          | APLS         | EPLS                    | Other..... |
| <b>Experienced real-life neonatal resuscitations</b>      | 0         | 1-2      | 3-5          | 6-9                     | ≥ 10       |
|                                                           |           |          |              |                         |            |
| <b>Working experience in pediatrics</b>                   | 1-2 years |          | 3-5 years    | 6-9 years               | ≥ 10 years |
| <b>Working experience at neonatal IC or HC</b>            | ≤ 1 month |          | 2 – 4 months | 5 months – 2 years      | > 2 years  |
| <b>Working experience at pediatric IC or HC</b>           | ≤ 1 month |          | 2 – 4 months | 5 months – 2 years      | > 2 years  |
| <b>Additional relevant working experience or training</b> |           |          |              |                         |            |
|                                                           |           |          |              |                         |            |
| <b>Study group</b>                                        | Lecture   |          |              | Video-based instruction |            |

## Legend

NP, nurse practitioner; PA, physician assistant; NALS, neonatal advanced life support; NLS, neonatal life support; APLS, advanced paediatric life support; EPLS, European paediatric life support; IC, intensive care; HC, high care.
